# Supplementary material for: The Implication of Serum Autoantibodies in Prognosis of Canine Mammary Tumors
Source: MDPI journal article supplement (doi:10.3390/ani12182463), 2022-09-18
Supplement: s1 [file s1]

Table S2. Clinicopathological characteristics of 11 malignant CMT dogs enrolled for assessment of serum AAb levels before and after surgery

| Breed              | Age (year) | B.W. (kg) | Spayed status <sup>1</sup> | Clinical stage |
|--------------------|------------|-----------|----------------------------|----------------|
| Chihuahua          | 12         | 2.7       | Fi                         | I              |
| Poodle             | 10         | 2.7       | Fi                         | I              |
| Dachshund          | 9          | 7.1       | Fs                         | I              |
| Maltese            | 8          | 2.4       | Fs                         | III            |
| Labrador Retriever | 14         | 32        | Fs                         | IV             |
| Bichon             | 11         | 4.8       | Fi                         | I              |
| French Bull dog    | 7          | 12.6      | Fs                         | I              |
| Border Collie      | 8          | 23.5      | Fi                         | I              |
| Shih-Tsu           | 10         | 4.4       | Fs                         | II             |
| Poodle             | 14         | 5.4       | Fs                         | I              |
| Dachshund          | 9          | 8.5       | Fs                         | I              |

<sup>1</sup> Fi: intact female; Fs: spayed female
