# Supplementary material for: The Implication of Serum Autoantibodies in Prognosis of Canine Mammary Tumors
Source: MDPI journal article supplement (doi:10.3390/ani12182463), 2022-09-18
Supplement: s1 [file s1]

Figure S2

(A)

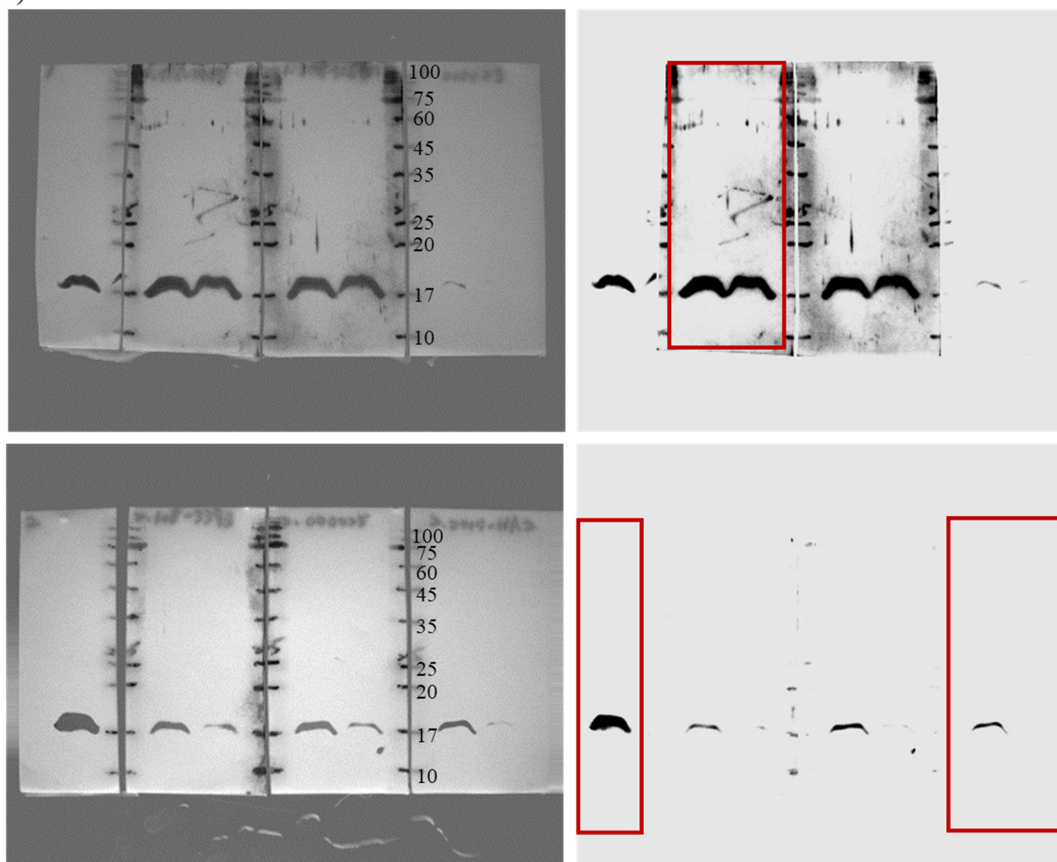

(B)

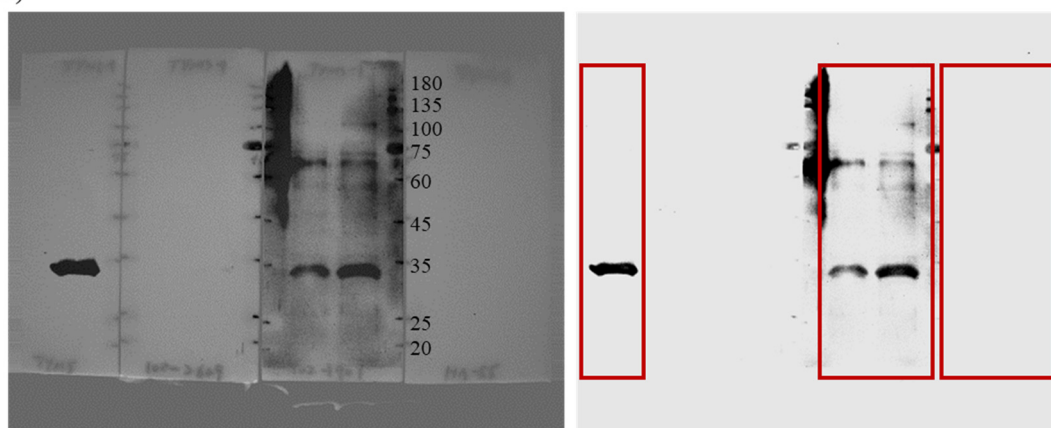

**Figure S2.** (A) Original images of Figure S1 (A). (B) Original images of Figure S1 (B).

(C)

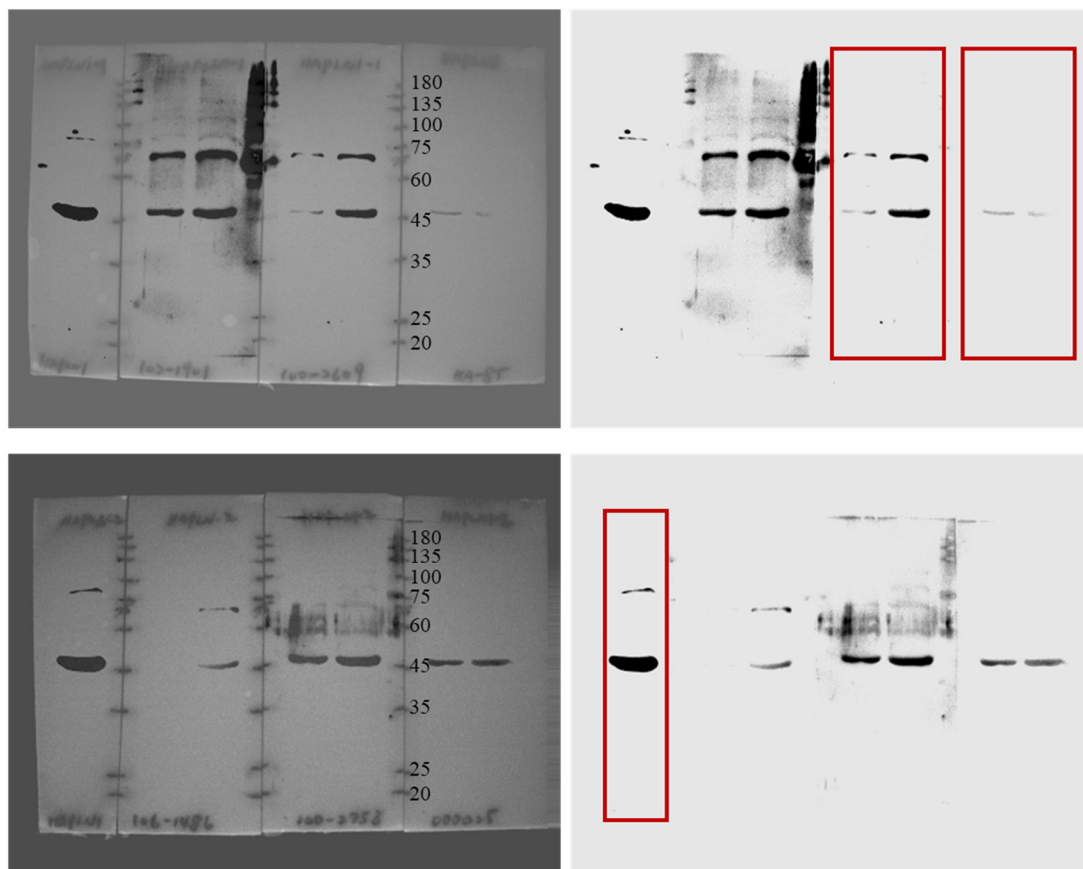

**Figure S2.** (C) Original images of Figure S1 (C).

(D)

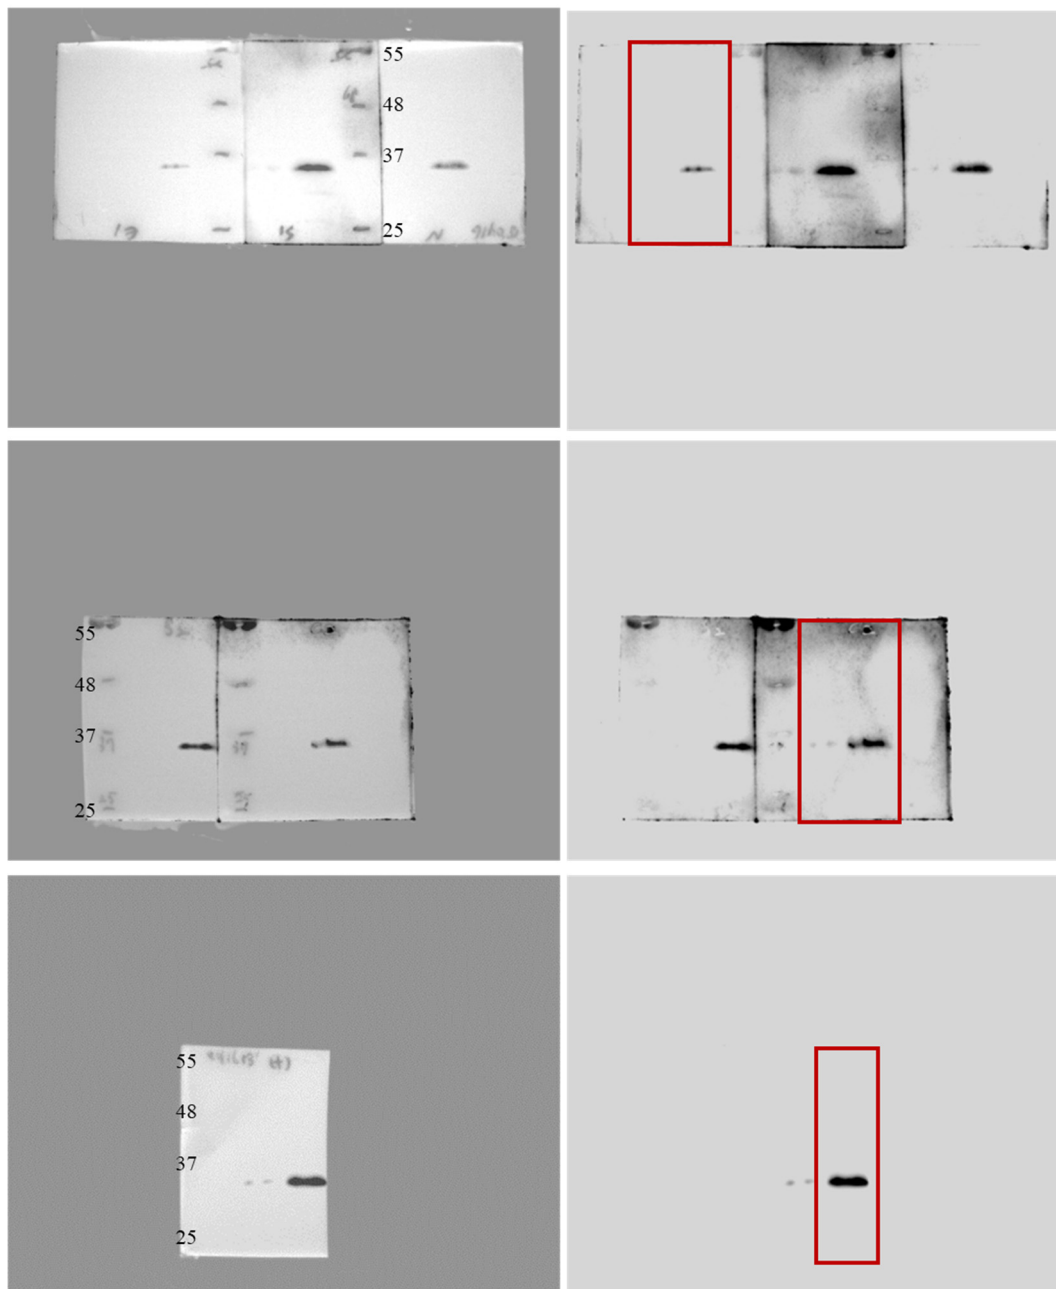

**Figure S2.** (D) Original images of Figure S1 (D).
