# Supplementary material for: The Implication of Serum Autoantibodies in Prognosis of Canine Mammary Tumors
Source: MDPI journal article supplement (doi:10.3390/ani12182463), 2022-09-18
Supplement: s1 [file s1]

Table S1. Clinical characteristics and serum levels of CMT-associated AAbs in 90 CMT dogs enrolled in the overall survival analysis

| Characteristics      | Case number | TYMS-AAb               |                   | IGFBP5-AAb             |                   | HAPLN1-AAb             |                   | AGR2-AAb               |                   |
|----------------------|-------------|------------------------|-------------------|------------------------|-------------------|------------------------|-------------------|------------------------|-------------------|
|                      |             | Median (range)         | Mean $\pm$ SD     |
| MT                   |             |                        |                   |                        |                   |                        |                   |                        |                   |
| BMT                  | 20          | 0.338<br>(0.189–0.598) | 0.355 $\pm$ 0.111 | 0.294<br>(0.158–0.502) | 0.294 $\pm$ 0.085 | 0.326<br>(0.203–0.603) | 0.350 $\pm$ 0.093 | 0.262<br>(0.126–0.515) | 0.262 $\pm$ 0.103 |
| MMT                  | 70          | 0.383<br>(0.273–0.733) | 0.406 $\pm$ 0.099 | 0.329<br>(0.179–0.532) | 0.338 $\pm$ 0.078 | 0.366<br>(0.227–1.017) | 0.395 $\pm$ 0.120 | 0.275<br>(0.139–0.533) | 0.299 $\pm$ 0.111 |
| Clinical stage (MMT) |             |                        |                   |                        |                   |                        |                   |                        |                   |
| I                    | 34          | 0.379<br>(0.289–0.733) | 0.407 $\pm$ 0.107 | 0.307<br>(0.179–0.532) | 0.329 $\pm$ 0.093 | 0.381<br>(0.273–1.017) | 0.413 $\pm$ 0.138 | 0.274<br>(0.140–0.533) | 0.294 $\pm$ 0.106 |
| II                   | 9           | 0.354<br>(0.288–0.450) | 0.367 $\pm$ 0.052 | 0.323<br>(0.244–0.442) | 0.334 $\pm$ 0.053 | 0.361<br>(0.227–0.463) | 0.355 $\pm$ 0.022 | 0.287<br>(0.152–0.517) | 0.314 $\pm$ 0.132 |
| III                  | 16          | 0.422<br>(0.273–0.605) | 0.413 $\pm$ 0.084 | 0.367<br>(0.258–0.506) | 0.362 $\pm$ 0.057 | 0.329<br>(0.249–0.545) | 0.371 $\pm$ 0.093 | 0.267<br>(0.147–0.479) | 0.293 $\pm$ 0.113 |
| IV                   | 7           | 0.390<br>(0.282–0.728) | 0.439 $\pm$ 0.153 | 0.338<br>(0.218–0.424) | 0.338 $\pm$ 0.071 | 0.474<br>(0.289–0.661) | 0.453 $\pm$ 0.133 | 0.287<br>(0.139–0.529) | 0.315 $\pm$ 0.147 |
| V                    | 4           | 0.398<br>(0.344–0.462) | 0.400 $\pm$ 0.052 | 0.323<br>(0.230–0.411) | 0.323 $\pm$ 0.075 | 0.324<br>(0.287–0.358) | 0.323 $\pm$ 0.034 | 0.279<br>(0.246–0.395) | 0.300 $\pm$ 0.070 |
